# Supplementary material for: Promptness of oxytocin administration for first-line treatment of postpartum hemorrhage: a national vignette-based study among midwives
Source: Springer Nature journal article supplement (doi:10.1186/s12884-022-04648-5), 2022-04-23
Supplement: MOESM1 [file 20338070]

## Vignette 1

Despite your actions, bleeding persists. Uterus is hypotonic

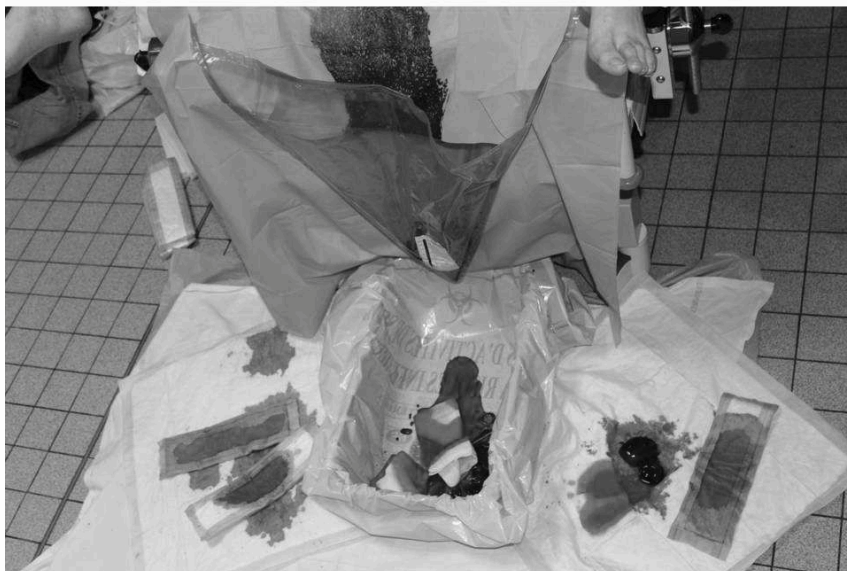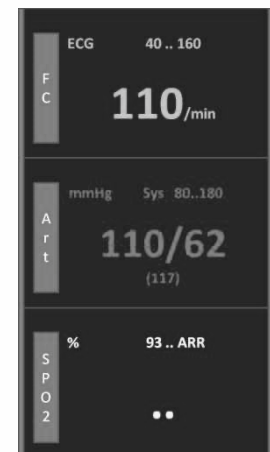

What measures would you perform **within the next 15 minutes** ?

## Vignette 1

**30 minutes later, despite your actions, bleedings persists. The uterus is hypotonic when you stop the uterine massage. The patient does not feel very well and is dizzy.**

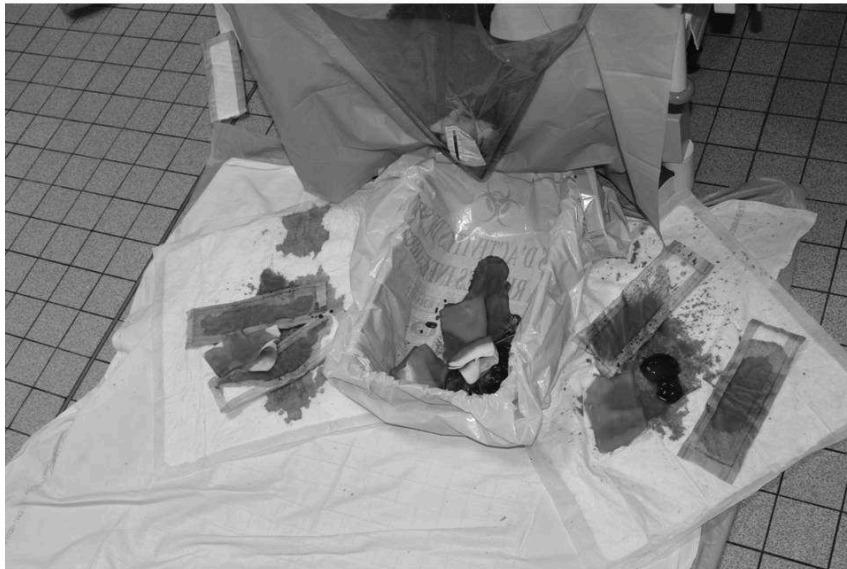

|                  |                       |
|------------------|-----------------------|
| ECG              | 40 .. 160             |
| F<br>C           | <b>120</b> /min       |
| mmHg             | Sys 80..180           |
| A<br>r<br>t      | <b>81/42</b><br>(117) |
| %                | 93 .. ARR             |
| S<br>P<br>O<br>2 | <b>98</b>             |

What measures you propose at this stage ?
